# Supplementary material for: Omics Studies Revealed the Factors Involved in the Formation of Colony Boundary in Myxococcus xanthus
Source: MDPI journal article supplement (doi:10.3390/cells8060530), 2019-06-03
Supplement: s1 [file s1]

**Omics Studies Revealed the Factors Involved in the Formation of Colony Boundary in  
*Myxococcus xanthus***

Mian Nabeel Anwar, Zhi Feng Li, Ya Gong, Raghvendra Pratap Singh and Yue-zhong Li \*

State Key Laboratory of Microbial Technology, Institute of Microbial Technology, Shandong University, Qingdao  
266237, P.R. China

Email addresses of the authors: [miannabeelanwar@gmail.com](mailto:miannabeelanwar@gmail.com) [lilab@sdu.edu.cn](mailto:lilab@sdu.edu.cn)

\* The corresponding author.

**Supplementary tables (S1-S6)**

**Table S1: Porin proteins**

| Protein ID | Protein description               | Gene ID   | Mean value                    |                                |                                            | Log2 (Fold change)        |                           |
|------------|-----------------------------------|-----------|-------------------------------|--------------------------------|--------------------------------------------|---------------------------|---------------------------|
|            |                                   |           | DK1622-ΔMXAN_0049<br>Boundary | DK1622-DK1622<br>No-boundary 1 | ΔMXAN_0049-<br>ΔMXAN_0049<br>No-boundary 2 | Boundary/No<br>boundary 1 | Boundary/No<br>boundary 2 |
| Q1D031     | Uncharacterized protein           | MXAN_5855 | 15.67333                      | 42.16333                       | 38.7                                       | -6.42                     | -5.79                     |
| Q1DEU2     | Phosphate-selective porin O and P | MXAN_0562 | N.A                           | 16.92333                       | 17.94333                                   | -8.00                     | -8.33                     |
| Q1D5R1     | Uncharacterized protein           | MXAN_3830 | 7.283333                      | 13.79                          | 10.56333                                   | -2.94                     | -1.61                     |
| Q1D8U8     | LPS-assembly protein LptD         | MXAN_2708 | 0.833333                      | 2.393333                       | 0.836667                                   | -0.72                     | 0.001                     |
| Q1DDT8     | Uncharacterized protein           | MXAN_0924 | 3.476667                      | 14.22                          | 14.22                                      | -5.49                     | -5.49                     |
| Q1D1X6     | OmpA domain protein               | MXAN_5194 | 12.18                         | 19.54                          | 13.30667                                   | -2.58                     | -0.45                     |
| Q1CVR0     | Uncharacterized protein           | MXAN_7407 | 0                             | 8.693333                       | 4.99                                       | -4.67                     | -2.58                     |
| Q1CZE8     | Uncharacterized protein           | MXAN_6090 | 9.696667                      | 23.13                          | 17.57667                                   | -4.70                     | -3.056                    |
| Q1DFS2     | Uncharacterized protein           | MXAN_0219 | 5.153333                      | 16.83333                       | 10.69                                      | -5.28                     | -2.92                     |

- N.A = Not appeared in the sample

**Table S2: TonB-dependent receptor**

| Protein ID | Protein Description              | Gene ID   | Mean value                               |                                |                                                         |
|------------|----------------------------------|-----------|------------------------------------------|--------------------------------|---------------------------------------------------------|
|            |                                  |           | DK1622- $\Delta$ MXAN_0049<br>(Boundary) | DK1622-DK1622<br>(No-boundary) | $\Delta$ MXAN_0049- $\Delta$ MXAN_0049<br>(No-boundary) |
| Q1DCB6     | TonB-dependent receptor          | MXAN_1450 | 59.1                                     | 57.56667                       | 52.82667                                                |
| Q1D365     | TonB-dependent receptor          | MXAN_4746 | 41.42333                                 | 40.93333                       | 40.13333                                                |
| Q1D2E5     | TonB dependent receptor          | MXAN_5023 | 15.92                                    | 24.77333                       | 15.21                                                   |
| Q1CXB1     | TonB-dependent receptor          | MXAN_6845 | 8.256667                                 | N.A                            | N.A                                                     |
| Q1D3P6     | Putative tonB dependent receptor | MXAN_4559 | 6.32                                     | 10.28667                       | 8.54                                                    |
| Q1DE39     | TonB family protein              | MXAN_0821 | 3.73                                     | 9.926667                       | 9.02                                                    |
| Q1DEY6     | Putative TonB-dependent receptor | MXAN_0518 | 3.026667                                 | 10.78667                       | 7.933333                                                |
| Q1CX48     | TonB-dependent receptor          | MXAN_6911 | 3.213333                                 | 26.10333                       | 18.12333                                                |
| Q1CY23     | Putative TonB-dependent receptor | MXAN_6579 | 0.496667                                 | 10.91                          | 6.476667                                                |
| Q1DBN3     | TonB family protein              | MXAN_1688 | N.A                                      | 6.33                           | 2.3                                                     |
| Q1CVX9     | TonB-dependent receptor          | MXAN_7331 | 1.62                                     | 4.856667                       | 1.99                                                    |
| Q1CZJ4     | TonB-dependent receptor          | MXAN_6044 | 1.856667                                 | 2.883333                       | 2.003333                                                |
| Q1DE06     | TonB family protein              | MXAN_0856 | N.A                                      | 2.983333                       | 2.103333                                                |
| Q1DCQ0     | Putative tonB dependent receptor | MXAN_1316 | N.A                                      | 4.073333                       | 1.936667                                                |

- N.A= Not appeared in the sample

**Table S3: Cold shock proteins**

| Protein description | Gene ID                         | Uniprot ID | Mean value                      |                                |                                            |
|---------------------|---------------------------------|------------|---------------------------------|--------------------------------|--------------------------------------------|
|                     |                                 |            | DK1622-ΔMXAN_0049<br>(Boundary) | DK1622-DK1622<br>(No-boundary) | ΔMXAN_0049-<br>ΔMXAN_0049<br>(No-boundary) |
| Q1DEI3              | Cold-shock protein CspC         | MXAN_0672  | 77.61                           | 13.93                          | 13.93                                      |
| Q1CZK1              | Cold-shock protein CspE         | MXAN_6037  | 76.47                           | 36.76                          | 20.59                                      |
| Q1D1L2              | Cold-shock protein CspB         | MXAN_5310  | 75.7567                         | 7.07                           | N.A                                        |
| Q1D6F1              | Cold-shock protein CspD         | MXAN_3582  | 64.1767                         | 17.4167                        | 6.96667                                    |
| Q1D730              | Cold-shock protein, CspA family | MXAN_3345  | 42.29                           | 4.97                           | 4.97                                       |
| Q1DBV4              | Cold-shock protein CspA         | MXAN_1617  | 19.12                           | 6.86333                        | 2.94                                       |

• N.A= Not appeared in the sample

**Table S4: RNA degradation pathway**

| Protein                                                 | Components in pathway | Unipot ID | Gene ID   | Mean value                            |                             |                                                      |
|---------------------------------------------------------|-----------------------|-----------|-----------|---------------------------------------|-----------------------------|------------------------------------------------------|
|                                                         |                       |           |           | DK1622- $\Delta$ MXAN_0049 (Boundary) | DK1622-DK1622 (No-boundary) | $\Delta$ MXAN_0049- $\Delta$ MXAN_0049 (No-boundary) |
| Enolase                                                 | Eno                   | Q1D401    | MXAN_4451 | 45.06333                              | 59.33667                    | 54.71                                                |
| Polyribonucleotide nucleotidyltransferase               | PnPase                | Q1DAM1    | MXAN_2073 | 40.16333                              | 30.56667                    | 36.61                                                |
| 3'-5' exoribonuclease                                   | RNaseR                | Q1DGB6    | MXAN_0024 | 2.693333                              | 0.633333                    | 2.27                                                 |
| RNA helicase DeaD                                       | Helicase              | Q1D5I0    | MXAN_3913 | 2.826667                              | N.A                         | 3.156667                                             |
| Transcription termination factor Rho                    | Rho                   | Q1D9H4    | MXAN_2479 | 14.37                                 | 6.123333                    | 3.413333                                             |
| ATP-dependent helicase, DEAD/DEAH-box family            | CshA                  | Q1D5I0    | MXAN_3913 | 2.826667                              | N.A                         | 3.156667                                             |
|                                                         |                       | Q1D015    | MXAN_5871 | 11.75667                              | 10.64333                    | 9.28                                                 |
| Metallo-beta-lactamase family protein<br>Ribonuclease J | RNaseJ                | Q1DC87    | MXAN_1479 | 4.09                                  | N.A                         | 0.793333                                             |
| Putative ATP-dependent RNA helicase                     | RhlE                  | Q1D514    | MXAN_4081 | 2.126667                              | N.A                         | N.A                                                  |
| Poly(A) polymerase I                                    | pcnB                  | Q1D9A9    | MXAN_2545 | 1.216667                              | 6.263333                    | 4.38                                                 |
| Heat shock protein 70 family protein                    | DnaK                  | Q1D8Q9    | MXAN_2747 | 4.36                                  | 1.62                        | 0                                                    |
|                                                         |                       | Q1D6Q3    | MXAN_3474 | 1.973333                              | N.A                         | 0.803333                                             |
|                                                         |                       | P95334    | MXAN_6671 | 10.76                                 | 2.306667                    | N.A                                                  |
|                                                         |                       | Q1CWT5    | MXAN_7025 | 7.893333                              | 6.03                        | 6.91                                                 |
| chaperonin GroEL                                        | GroEL                 | Q1D3Y5    | MXAN_4467 | 80.49667                              | 60.81667                    | 66.24                                                |
|                                                         |                       | Q1D2S1    | MXAN_4895 | 83.42333                              | 73.71                       | 75.04667                                             |

- N.A= Not appeared in the sample

**Table S5: Type 6 secretion system (T6SS)**

| Unipot ID | Gene      | Protein                              | Components | Mean value                                 |                          |                                                           |
|-----------|-----------|--------------------------------------|------------|--------------------------------------------|--------------------------|-----------------------------------------------------------|
|           |           |                                      |            | DK1622-<br><i>ΔMXAN_0049</i><br>(Boundary) | DK1622-<br>(No-boundary) | <i>ΔMXAN_0049</i> -<br><i>ΔMXAN_0049</i><br>(No-boundary) |
| Q1D0W1    | MXAN_5573 | Rhs element Vgr family protein       | VgrG       | 3.88                                       | N.A                      | N.A                                                       |
| Q1D312    | MXAN_4800 | Rhs element Vgr family protein       | VgrG       | 2.076667                                   | 0.396667                 | 0                                                         |
| Q1D310    | MXAN_4802 | hypothetical protein                 | Imp/Vas    | 3.59                                       | N.A                      | 1.466667                                                  |
| Q1D309    | MXAN_4803 | hypothetical protein                 | DotU       | 3.08                                       | N.A                      | N.A                                                       |
| Q1D305    | MXAN_4807 | hypothetical protein                 | VipA       | 36.18                                      | 27.03                    | 17.48                                                     |
| Q1D304    | MXAN_4808 | hypothetical protein                 | VipB       | 14.30667                                   | 13.49667                 | 7.556667                                                  |
| Q1D303    | MXAN_4809 | hypothetical protein                 | Hcp        | 38.85333                                   | 30.87667                 | 27.40333                                                  |
| Q1D2Z9    | MXAN_4813 | ATP-dependent chaperone protein ClpB | ATPase     | 3.993333                                   | 1.28                     | 2.976667                                                  |

- N.A = Not appeared in the sample

**Table S6: Different secondary metabolites significantly present within boundary as compared to non-boundary.**

| Compound      | Sample                                    | RT [min] | Calc .m/z<br>[M+H] | Formula                                                                      | S/N (Signal) | Area     | Intensity (I) | Difference with<br>boundary by<br>Area (in folds) |
|---------------|-------------------------------------------|----------|--------------------|------------------------------------------------------------------------------|--------------|----------|---------------|---------------------------------------------------|
| Myxochelin A  | DK1622-MXAN_0049                          | 23.8     | 405.1656           | C <sub>20</sub> H <sub>24</sub> N <sub>2</sub> O <sub>7</sub>                | 317.9        | 2108247  | 244396        |                                                   |
|               | DK1622-DK1622                             | 23.8     | 405.1656           | C <sub>20</sub> H <sub>24</sub> N <sub>2</sub> O <sub>7</sub>                | 91           | 832396.1 | 75892         | 2.53                                              |
|               | $\Delta$ MXAN_0049-<br>$\Delta$ MXAN_0049 | 23.8     | 405.1656           | C <sub>20</sub> H <sub>24</sub> N <sub>2</sub> O <sub>7</sub>                | 17.1         | 131564   | 14720         | 16.02                                             |
| Myxochelin B  | DK1622-MXAN_0049                          | 17.6     | 404.1816           | C <sub>20</sub> H <sub>25</sub> N <sub>3</sub> O <sub>6</sub>                | 639.3        | 4192147  | 445198        |                                                   |
|               | DK1622-DK1622                             | 17.6     | 404.1816           | C <sub>20</sub> H <sub>25</sub> N <sub>3</sub> O <sub>6</sub>                | 96.7         | 855553   | 100828        | 4.89                                              |
|               | $\Delta$ MXAN_0049-<br>$\Delta$ MXAN_0049 | 17.5     | 404.1816           | C <sub>20</sub> H <sub>25</sub> N <sub>3</sub> O <sub>6</sub>                | 34.2         | 50265    | 22660         | 83.40                                             |
| Myxochelin D  | DK1622-MXAN_0049                          | 16.8     | 433.1969           | C <sub>22</sub> H <sub>29</sub> N <sub>2</sub> O <sub>7</sub>                | 1556.4       | 7247738  | 1027842       |                                                   |
|               | DK1622-DK1622                             | 16.8     | 433.1969           | C <sub>22</sub> H <sub>29</sub> N <sub>2</sub> O <sub>7</sub>                | 6.8          | 145751   | 14358         | 49.72                                             |
|               | $\Delta$ MXAN_0049-<br>$\Delta$ MXAN_0049 | 16.9     | 433.1969           | C <sub>22</sub> H <sub>29</sub> N <sub>2</sub> O <sub>7</sub>                | 3.5          | 18963.1  | 2598          | 382.20                                            |
| Myxochelin J8 | DK1622-MXAN_0049                          | 31.5     | 408.1584           | C <sub>20</sub> H <sub>22</sub> F <sub>2</sub> N <sub>2</sub> O <sub>5</sub> | 1082.6       | 4607838  | 484542        |                                                   |
|               | DK1622-DK1622                             | 31.5     | 408.1584           | C <sub>20</sub> H <sub>22</sub> F <sub>2</sub> N <sub>2</sub> O <sub>5</sub> | 140.6        | 417100.6 | 56648         | 11.04                                             |
|               | $\Delta$ MXAN_0049-<br>$\Delta$ MXAN_0049 | N.A      | 408.1584           | C <sub>20</sub> H <sub>22</sub> F <sub>2</sub> N <sub>2</sub> O <sub>5</sub> | 170.8        | 472527.6 | 54878         | 9.75                                              |
| Neriifolin    | DK1622-MXAN_0049                          | 47       | 535.3265           | C <sub>30</sub> H <sub>47</sub> O <sub>8</sub>                               | 539.6        | 2158950  | 270494        |                                                   |
|               | DK1622-DK1622                             | 47       | 535.3265           | C <sub>30</sub> H <sub>47</sub> O <sub>8</sub>                               | 3.6          | 67637.5  | 8054          | 33.58                                             |
|               | $\Delta$ MXAN_0049-<br>$\Delta$ MXAN_0049 | 47       | 535.3265           | C <sub>30</sub> H <sub>47</sub> O <sub>8</sub>                               | 4.9          | 75890.9  | 5124          | 52.78                                             |

**Table S7 : Proteins in Phenylalanine, tyrosine and tryptophan biosynthesis (KEGG Pathway ID #mxa00400)**

| Protein (Uniprot ID)       | Protein Name /Enzyme ID                                             | Gene ID          | DK1622- $\Delta$ MXAN_0049<br>(Boundary) | DK1622-<br>DK1622<br>(No-boundary) | $\Delta$ MXAN_0049-<br>$\Delta$ MXAN_0049<br>(No-boundary) |
|----------------------------|---------------------------------------------------------------------|------------------|------------------------------------------|------------------------------------|------------------------------------------------------------|
|                            |                                                                     |                  | Mean value (coverage)                    |                                    |                                                            |
| Phenylalanine biosynthesis |                                                                     |                  |                                          |                                    |                                                            |
| Q1D7F3                     | Chorismate mutase/prephenate dehydratase; ( EC=5.4.99.5)            | MXAN_3221        | 1.23                                     | 0                                  | 0                                                          |
| Q1DEX3                     | Aminotransferase, class I [EC:2.6.1.1]                              | MXAN_0531        | 24.34667                                 | 21.81333                           | 27.03667                                                   |
| Q1D6Z0                     | Aminotransferase; [ EC=2.6.1.9]                                     | MXAN_3386        | 36.95333                                 | 32.57667                           | 28.19667                                                   |
| Q1D556                     | Histidinol-phosphate aminotransferase [EC=2.6.1.9]                  | MXAN_4038        | 7.99                                     | 1.193333                           | 0.826667                                                   |
| Tyrosine biosynthesis      |                                                                     |                  |                                          |                                    |                                                            |
| Q1D7F3                     | Chorismate mutase/prephenate dehydratase; ( EC=5.4.99.5)            | MXAN_3221        | 1.23                                     | 0                                  | 0                                                          |
| Q1D242                     | Aromatic amino acid hydroxylase, biopterin-dependent [EC:1.14.16.1] | MXAN_5127        | 4.063333                                 | 1.016667                           | 3.746667                                                   |
| Q1D046                     | prephenate dehydrogenase [EC:1.3.1.12]                              | MXAN_5840        | 0                                        | 0                                  | 0                                                          |
| Q1DEX3                     | Aminotransferase, class I [ EC=2.6.1.9]                             | MXAN_0531        | 24.34667                                 | 21.81333                           | 27.03667                                                   |
| Q1D6Z0                     | Aminotransferase; [ EC=2.6.1.9]                                     | MXAN_3386        | 36.95333                                 | 32.57667                           | 28.19667                                                   |
| Q1D556                     | Histidinol-phosphate aminotransferase; ( EC=2.6.1.9;                | MXAN_4038        | 7.99                                     | 1.193333                           | 0.826667                                                   |
| Tryptophan biosynthesis    |                                                                     |                  |                                          |                                    |                                                            |
| Q1D7F3                     | Chorismate mutase/prephenate dehydratase; ( EC=5.4.99.5)            | MXAN_3221        | 1.23                                     | 0                                  | 0                                                          |
| Q1CZG6                     | Putative anthranilate synthase, component I [EC:4.1.3.27)           | MXAN_6072        | 5.7                                      | 2.213333                           | 4.763333                                                   |
| Q1CZH6                     | Anthranilate phosphoribosyltransferase (EC:2.4.2.18)                | MXAN_6062 (trpD) | 0                                        | 2.76                               | 0                                                          |
| Q1CZH4                     | Phosphoribosylanthranilate isomerase (EC:5.3.1.24)                  | MXAN_6064 (trpF) | 0                                        | 0                                  | 0                                                          |
| Q1CZH5                     | Indole-3-glycerol phosphate synthase (EC=4.1.1.48)                  | MXAN_6063 (trpC) | 10.68667                                 | 0                                  | 0                                                          |
| Q1CZH2                     | Tryptophan synthase alpha chain (EC=4.2.1.20)                       | MXAN_6066 (trpA) | 2.533333                                 | 1.266667                           | 0                                                          |
| Q1CZH3                     | Tryptophan synthase beta chain (EC=4.2.1.20)                        | MXAN_6065 (trpB) | 18.28667                                 | 13.97                              | 9.976667                                                   |
